# Supplementary material for: Airborne particles in the Brazilian city of São Paulo: One-year investigation for the chemical composition and source apportionment
Source: Copernicus journal article supplement (doi:10.5194/acp-2017-317), 2017-04-21
Supplement: Supplementary file 1 [file acp-2017-317-supplement.pdf]

# Supplementary information

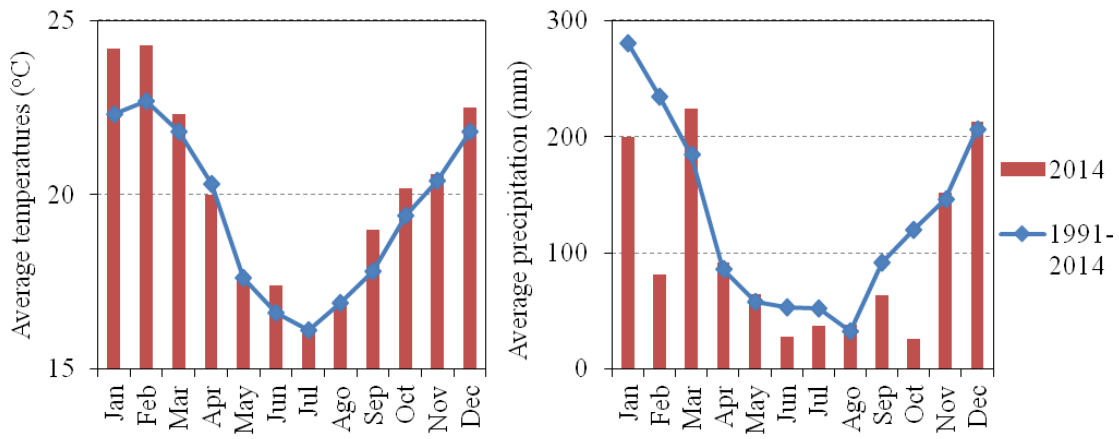

Figure S1. Comparison of monthly average temperatures for 2014 and average for the period 1991-2014 (IAG, 2014).

5 Table S1. Correlations between PM<sub>10</sub>, PM<sub>2.5</sub> and atmospheric conditions.

|                   | Min Temp.    | Avg. Temp. | Max Temp | Therm. Ampl. | Avg. Precip. | Min RH       | Avg. RH      | Avg. WS      |
|-------------------|--------------|------------|----------|--------------|--------------|--------------|--------------|--------------|
| PM <sub>10</sub>  | <b>-0.52</b> | -0.28      | 0.02     | <b>0.58</b>  | -0.23        | <b>-0.53</b> | <b>-0.38</b> | <b>-0.49</b> |
| PM <sub>2.5</sub> | <b>-0.48</b> | -0.21      | 0.04     | <b>0.56</b>  | -0.21        | <b>-0.55</b> | -0.26        | <b>-0.54</b> |

10

15

20



Table S3. Enrichment factors for all campaigns.

|           | <b>Int<sub>2,5</sub></b> | <b>Ext<sub>2,5</sub></b> | <b>Ext<sub>10</sub></b> |
|-----------|--------------------------|--------------------------|-------------------------|
| <b>Li</b> | 1.2                      | 1.9                      | 1.9                     |
| <b>Mg</b> | 0.34                     | 0.44                     | 0.47                    |
| <b>Al</b> | 1                        | 1                        | 1                       |
| <b>K</b>  | 3.5                      | 3.5                      | 2.8                     |
| <b>Ca</b> | 1.1                      | 1.0                      | 1.2                     |
| <b>Cr</b> | 8.5                      | <b>14.0</b>              | <b>13.5</b>             |
| <b>Mn</b> | 1.3                      | 2.3                      | 2.6                     |
| <b>Fe</b> | 0.7                      | 1.4                      | 1.7                     |
| <b>Co</b> | 0.7                      | 1.2                      | 1.7                     |
| <b>Ni</b> | 3.3                      | 7.0                      | 5.6                     |
| <b>Cu</b> | <b>120</b>               | <b>229</b>               | <b>233</b>              |
| <b>Zn</b> | <b>168</b>               | <b>207</b>               | <b>215</b>              |
| <b>As</b> | <b>69</b>                | <b>158</b>               | <b>103</b>              |
| <b>Se</b> | <b>5011</b>              | <b>7496</b>              | <b>4417</b>             |
| <b>Rb</b> | 3.3                      | 3.8                      | 2.8                     |
| <b>Sr</b> | 0.8                      | 1.0                      | 1.1                     |
| <b>Cd</b> | <b>710</b>               | <b>754</b>               | <b>642</b>              |
| <b>Sn</b> | <b>417</b>               | <b>639</b>               | <b>495</b>              |
| <b>Cs</b> | 4.9                      | 7.6                      | 6.1                     |
| <b>Tl</b> | <b>13.7</b>              | <b>27.9</b>              | <b>18.7</b>             |
| <b>Pb</b> | <b>187</b>               | <b>363</b>               | <b>276</b>              |
| <b>Bi</b> | <b>4233</b>              | <b>7388</b>              | <b>8822</b>             |

Table S4. Carbonaceous species in all campaigns.

|                                          | <b>Int<sub>2,5</sub></b> | <b>Ext<sub>2,5</sub></b> | <b>Ext<sub>10</sub></b> |
|------------------------------------------|--------------------------|--------------------------|-------------------------|
| <b>(<math>\mu\text{g m}^{-3}</math>)</b> | <b>Average</b>           | <b>Average</b>           | <b>Average</b>          |
|                                          | <b>(Min - Max)</b>       | <b>(Min - Max)</b>       | <b>(Min - Max)</b>      |
| <b>OC</b>                                | 10.2 (3.0–20.8)          | 6.7 (2.3–14.1)           | 7.8 (2.6–17.7)          |
| <b>EC</b>                                | 7.0 (0.6–15.9)           | 4.1 (0.6–13.4)           | 4.4 (0.3–17.6)          |
| <b>TOM</b>                               | 16.4                     | 10.7                     | 12.5                    |
| <b>OC/EC</b>                             | 1.5                      | 1.7                      | 1.8                     |

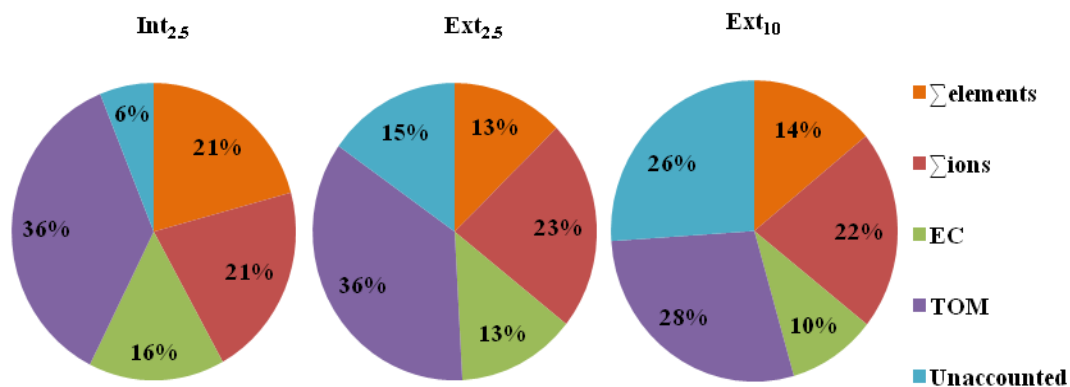

35 Figure S2. Mass balance for all campaigns.

Table S5. Biomass burning tracers for all campaigns.

|                        | Int <sub>2.5</sub>     | Ext <sub>2.5</sub>     | Ext <sub>10</sub>      |
|------------------------|------------------------|------------------------|------------------------|
| (ng m <sup>-3</sup> )  | Average<br>(Min - Max) | Average<br>(Min - Max) | Average<br>(Min - Max) |
| Lev                    | 509 (69–1263)          | 262 (15–1263)          | 319 (11–1854)          |
| Man                    | 45 (6–137)             | 26 (<DL–137)           | 29 (3–158)             |
| Gal                    | 33 (5–89)              | 21 (<DL–89)            | 30 (4–159)             |
| NssK <sup>+</sup>      | 809 (237–2007)         | 366 (49–1137)          | 413 (63–1181)          |
| Lev/Man                | 11.3                   | 10.1                   | 11                     |
| NssK <sup>+</sup> /Lev | 1.6                    | 1.4                    | 1.3                    |

Table S6. Fraction (%) of species in the fine and coarse particles\*.

|                              | Fine | Coarse |     | Fine | Coarse |
|------------------------------|------|--------|-----|------|--------|
| Lev                          | 76   | 24     | Cor | 73   | 27     |
| Man                          | 77   | 23     | Ca  | 34   | 66     |
| Cl <sup>-</sup>              | 49   | 51     | Fe  | 46   | 54     |
| NO <sub>3</sub> <sup>-</sup> | 45   | 55     | Cu  | 61   | 39     |
| SO <sub>4</sub> <sup>-</sup> | 66   | 34     | As  | 78   | 22     |
| Na <sup>+</sup>              | 51   | 49     | Cd  | 82   | 18     |
| NH <sub>4</sub> <sup>+</sup> | 80   | 20     | Pb  | 77   | 23     |
| nss-K <sup>+</sup>           | 73   | 27     | OC  | 82   | 18     |
| BaP                          | 82   | 18     | EC  | 86   | 14     |

\*The fractions were calculated for days when both PM<sub>10</sub> and PM<sub>2.5</sub> were collected.

40 Table S7. *Q* value to evaluate the number of factors.

|                   | 3 factors | 4 factors | 5 factors | 6 factors |
|-------------------|-----------|-----------|-----------|-----------|
| Qrobust (=Qtrue)  | 623       | 466       | 367       | 291       |
| Qexpected         | 591       | 502       | 413       | 324       |
| Qrobust/Qexpected | 1.05      | 0.93      | 0.89      | 0.90      |
|                   |           | -12 %     | -4 %      | 1 %       |

Factor Contributions (avg = 1)

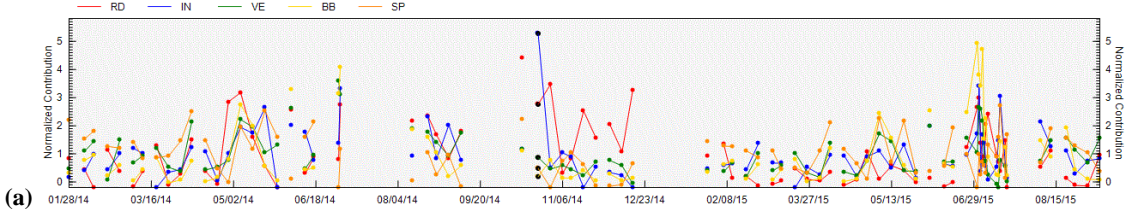

(a)

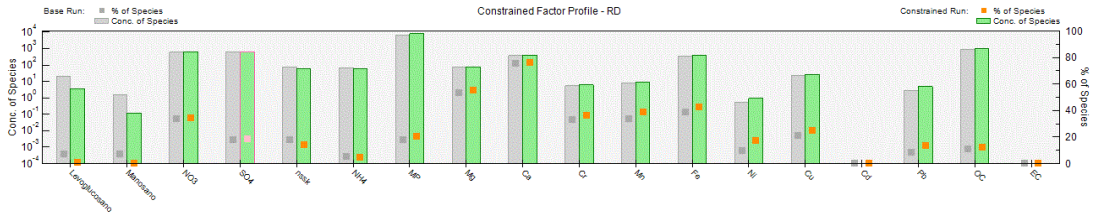

(b)

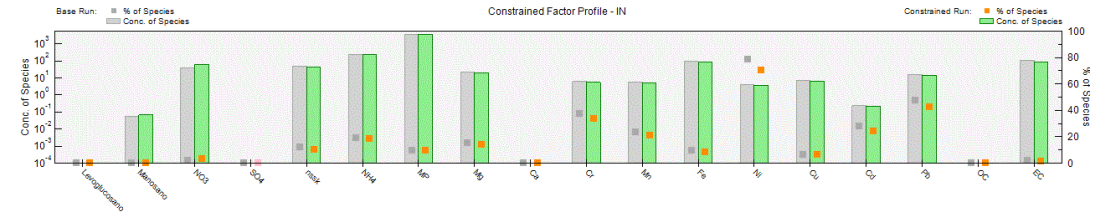

(c)

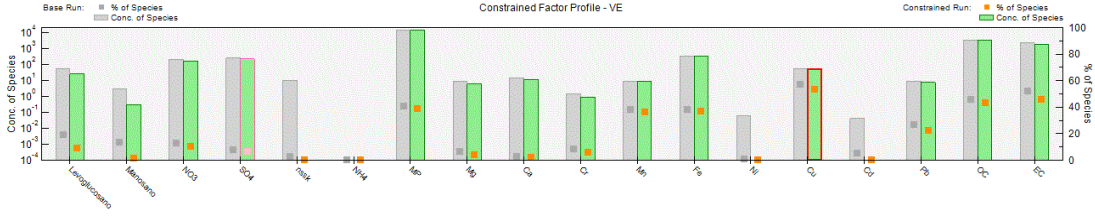

(d)

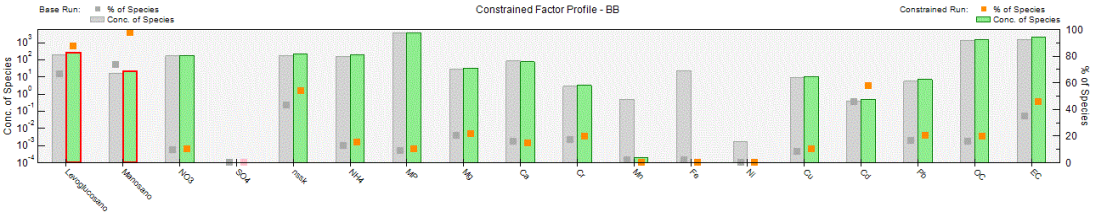

(e)

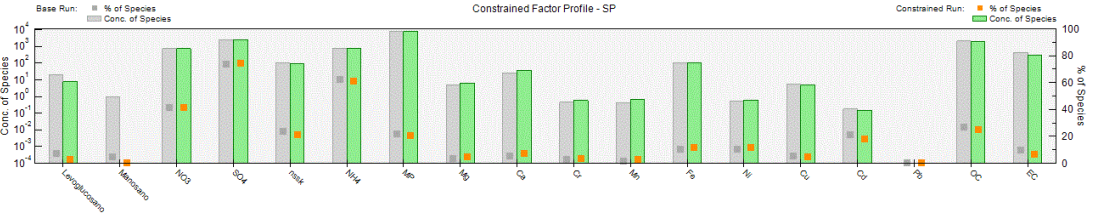

(f)

45

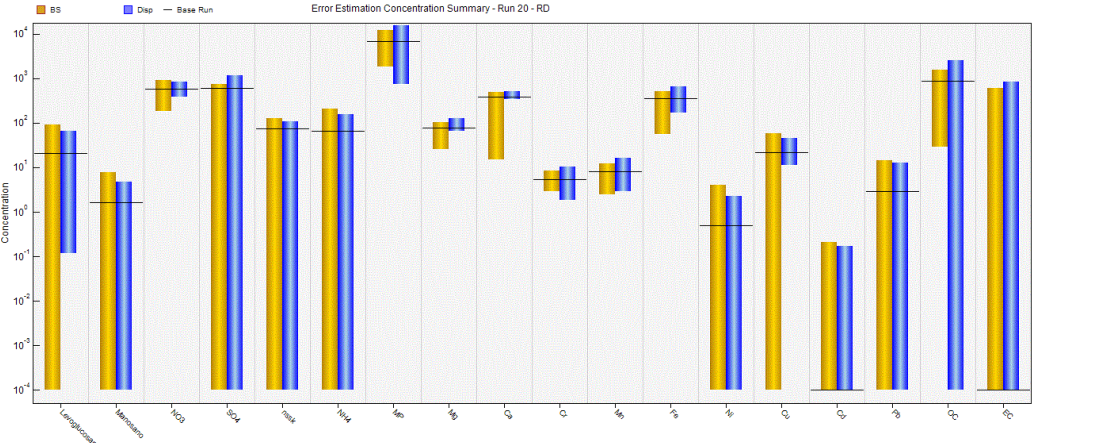

(g)

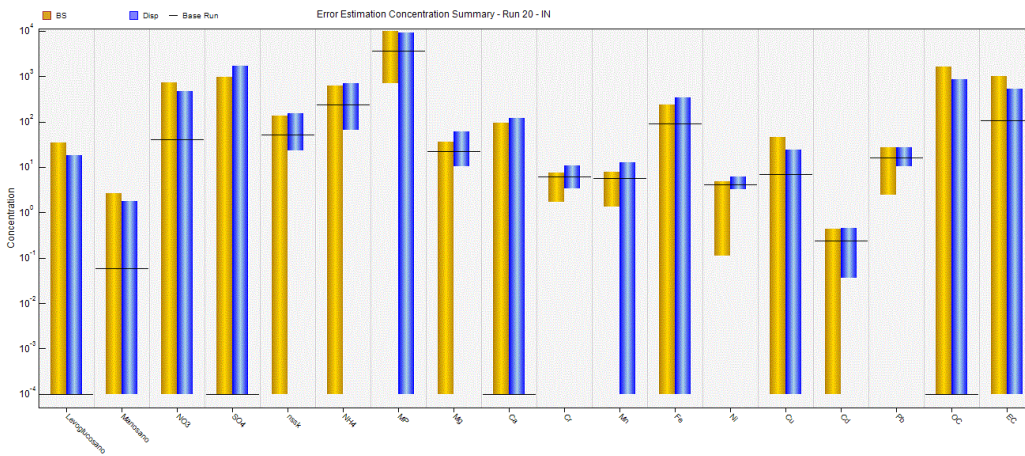

(h)

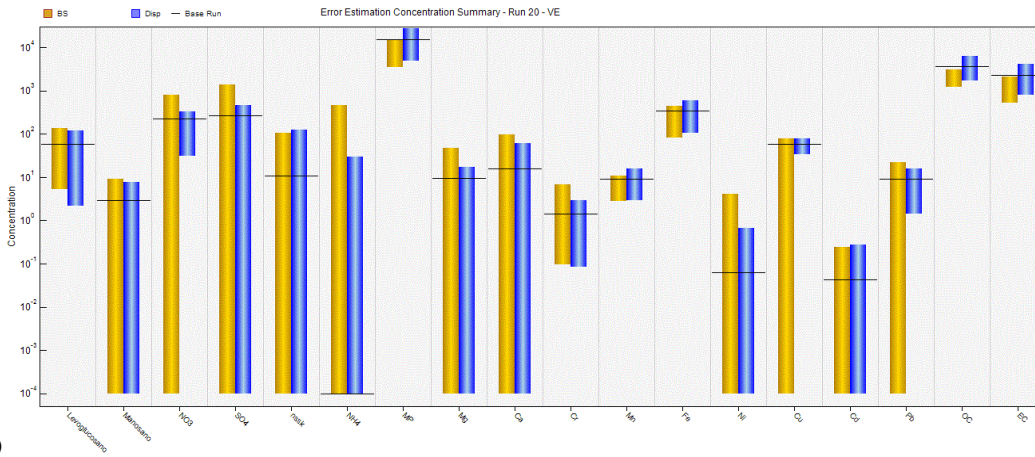

(i)

50

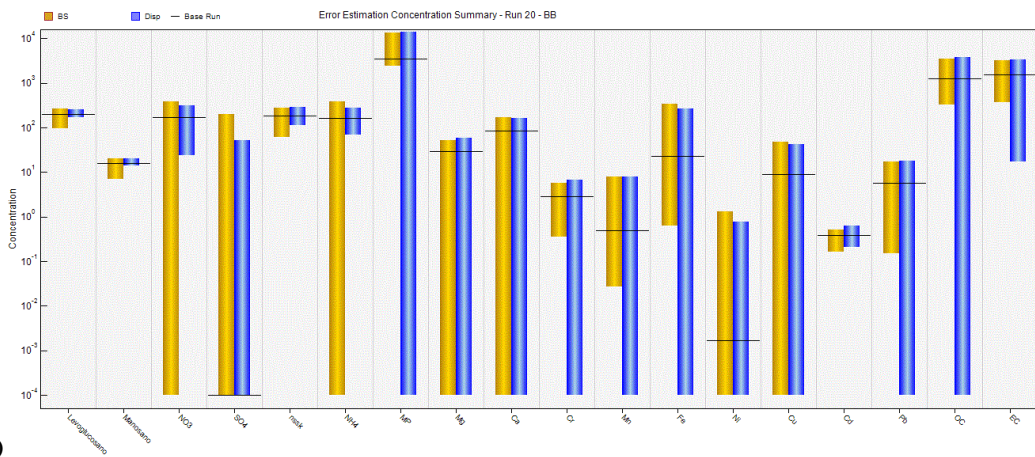

(j)

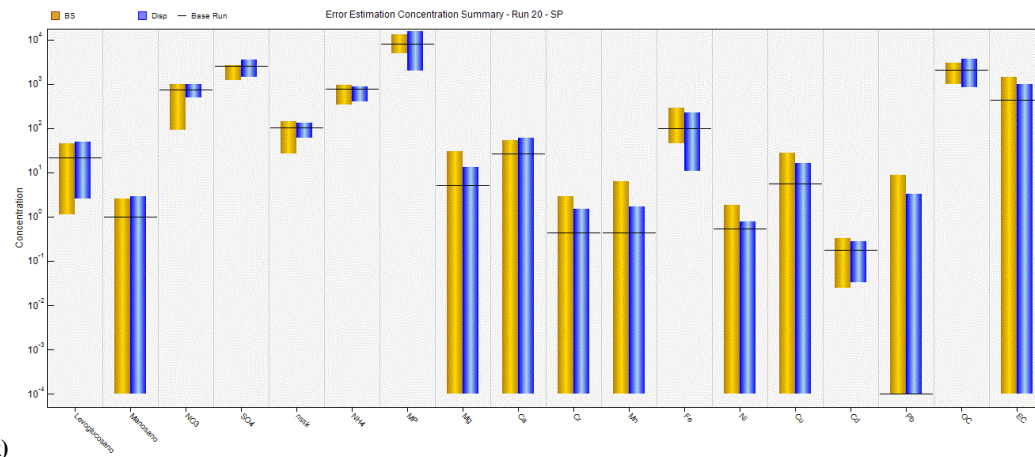

(k)

Figure S3. PMF charts (factor contributions – a; constrained factor profiles – b, c, d, e and f; and error concentration summaries – g, h, i, j and k).
